# Supplementary material
Source: PubMed Central journal article supplement (PMC1533305)
Supplement: bj3970519add.pdf [file bj3970519add.pdf]

## Supplemental Data:

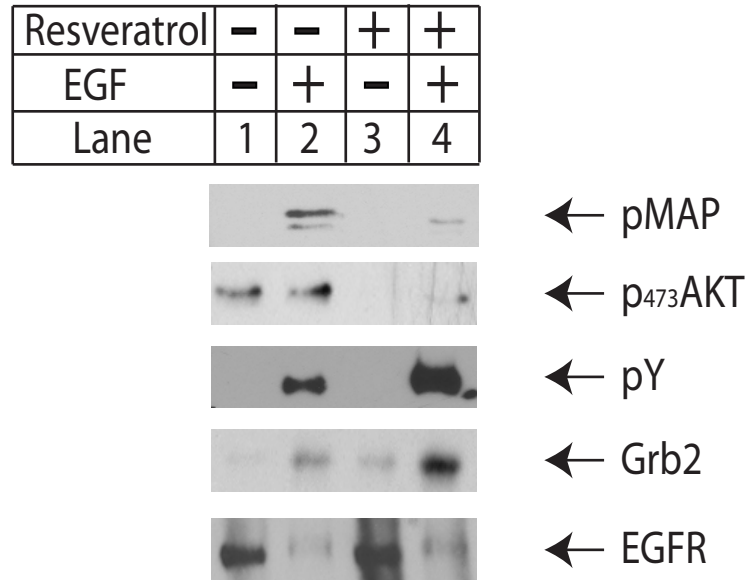

### **Resveratrol had no effect on EGF-induced tyrosine phosphorylation of EGFR.**

HEK-293 cells were serum starved in DMEM supplemented with 1  $\mu$ M Dexmethasone overnight. These cells were treated with resveratrol (100  $\mu$ M) for 20 mins before they were challenged with 100 ng/ml EGF for another 15 mins, as indicated in the Fig. Total cell lysates were prepared for both western blot analysis and immunoprecipitation. For western blot analysis, equal amount of samples were processed for SDS-PAGE, and blotted with antibodies against phosphorylated form of MAP (MAPK) and phosphorylated AKT at473 site (p<sub>473</sub>AKT). For immunoprecipitation, antibodies against EGFR (2  $\mu$ g) was added to each sample and immunoprecipitated protein was washed extensively with lysis buffer, and blotted for tyrosine phosphorylated EGFR (pY), Grb2, and total EGFR using their respective antibodies.
